# Supplementary material for: A one-dimensional chain of manganese(ii) bridged peroxomolybdate isolated from an aqueous Mn–polymolybdate–H2O2 system
Source: Royal Society of Chemistry journal article supplement (doi:10.1039/d3dt01243c), 2023-01-01
Supplement: d3dt01243c2.pdf [file d3dt01243c2.pdf]

## Electronic Supporting Information

# An one-dimensional chain of manganese(II) bridged peroxomolybdate isolated from aqueous Mn-polymolybdate-H<sub>2</sub>O<sub>2</sub> system

Jining Shang,<sup>a</sup> Xiang Li,<sup>a</sup> Yuanhang Ren,<sup>a</sup> Hongxin Ding,<sup>a</sup> Jiapeng Cao,<sup>a</sup> Rui He,<sup>a</sup> Bin Yue<sup>\*a</sup> and Heyong He<sup>\*a</sup>

<sup>a</sup>Department of Chemistry and Shanghai Key Laboratory of Molecular Catalysis and Innovative Materials, Fudan University, Shanghai 200438, P. R. China.

E-mail: yuebin@fudan.edu.cn and heyonghe@fudan.edu.cn.

### Materials and methods

(NH<sub>4</sub>)<sub>6</sub>[MnMo<sub>9</sub>O<sub>32</sub>]·6H<sub>2</sub>O was synthesised according to the literature method<sup>1</sup>. All other chemical reagents were commercially available and used without further purification, including MnSO<sub>4</sub>·H<sub>2</sub>O (AR, Aladdin), (NH<sub>4</sub>)<sub>4</sub>[Mo<sub>7</sub>O<sub>24</sub>]·4H<sub>2</sub>O (AR, Aladdin), 30% H<sub>2</sub>O<sub>2</sub> (AR, SCR), CsNO<sub>3</sub> (AR, Aladdin), CH<sub>3</sub>COOH (AR, SCR), CuSO<sub>4</sub>·5H<sub>2</sub>O (AR, SCR). TGA measurements were executed by a SDT Q600 thermogravimetric analyzer in a flowing air atmosphere from 25 to 800°C with a heating rate of 10°C·min<sup>-1</sup>. UV–Vis absorption spectra were recorded on a PerkinElmer Lambda 35 spectrophotometer. The concentration of each substance in the TMB and OPD reaction system is: 30 mM TMB/OPD, 300 mM H<sub>2</sub>O<sub>2</sub>, 0.303 mM **Cs-1** (in TMB system), 60.6 μM **Cs-1** (in OPD system), 0.6M acetate buffer with pH 4.5, reaction for 20 min. UV–Vis DRS measurements were executed by a PerkinElmer Lambda 650s spectrophotometer. PXRD patterns collected in the 2θ range from 5° to 50° were acquired on a Bruker D2 Phaser diffractometer with Cu-Kα (λ = 0.15418 nm) radiation. KBr pellets with samples were used to record FT-IR spectra on a Nicolet iS10 spectrometer in the range of 4000 to 400 cm<sup>-1</sup>. Cyclic voltammogram measurements were performed on a BioLogic SP-300 electrochemical workstation in a 0.6 M NaAc-HAc electrolyte solution with pH of 4.5. A three-electrode system was employed with glassy carbon paste electrode as a working electrode, Ag/AgCl electrode as a reference electrode, and Pt as a counter electrode. The carbon paste electrode was prepared as previously described.<sup>2</sup>

### Single crystal X-ray crystallography

Single crystal measurement of **Cs-1** was conducted on a Bruker D8 VENTURE-MetalJet diffractometer equipped with a PHOTON II area detector and HELIOS multilayer optics monochromator using Ga K<sub>α</sub> radiation (λ = 1.34138 Å). Diffraction data reduction was conducted using the APEX III software. The crystal structure of **1** was resolved *via* intrinsic phase method and refined by the full-matrix least-squares method on *F*<sup>2</sup> by SHELXTL-2018/3 crystallographic software package<sup>3</sup>. Anisotropic refinement was applied to all atoms during

the final phase of crystal structure refinement. Visualisation of the crystal structure of **1** was conducted using VESTA software package<sup>4</sup>.

**Table S1.** Crystal data and structural refinements.

| Compound                                                         | Cs-1                                                 |
|------------------------------------------------------------------|------------------------------------------------------|
| Empirical formula                                                | Cs <sub>4</sub> MnMo <sub>7</sub> O <sub>32.25</sub> |
| Formula weight                                                   | 1774.16                                              |
| Temperature (K)                                                  | 173(2)                                               |
| Wavelength (Å)                                                   | 1.34138                                              |
| Crystal system                                                   | Orthorhombic                                         |
| Space group                                                      | <i>Pnma</i>                                          |
| <i>a</i> (Å)                                                     | 23.5716(17)                                          |
| <i>b</i> (Å)                                                     | 10.7966(8)                                           |
| <i>c</i> (Å)                                                     | 12.5938(9)                                           |
| $\alpha$ (°)                                                     | 90                                                   |
| $\beta$ (°)                                                      | 90                                                   |
| $\gamma$ (°)                                                     | 90                                                   |
| Volume (Å <sup>3</sup> )                                         | 3205.0(4)                                            |
| <i>Z</i>                                                         | 4                                                    |
| <i>F</i> (000)                                                   | 3188                                                 |
| $\vartheta$ range (°)                                            | 3.262 to 55.163                                      |
| Reflections collected                                            | 3235                                                 |
| Goof on <i>F</i> <sup>2</sup>                                    | 1.081                                                |
| <i>R</i> <sub>1</sub> <sup>a</sup> [ <i>I</i> > 2σ( <i>I</i> )]  | 0.0619                                               |
| <i>wR</i> <sub>2</sub> <sup>b</sup> [ <i>I</i> > 2σ( <i>I</i> )] | 0.1673                                               |

[a]  $R_1 = \sum ||F_o| - |F_c|| / \sum |F_o|$ ;  $wR_2 = \{ \sum [w(F_o^2 - F_c^2)^2] / \sum [w(F_o^2)^2] \}^{1/2}$

**Table S2.** BVS calculation and bond valence calculations of selected atoms in Cs-1.

| Atom 1  | Atom 2    | $R_0$ value <sup>5</sup> | $B$ value <sup>5</sup> | Length (Å) | Bond valence | Valence sum |
|---------|-----------|--------------------------|------------------------|------------|--------------|-------------|
| Mn1     | O(9)      | 1.79                     | 0.37                   | 2.118(10)  | 0.411        | 2.285       |
|         | O(9)#13   | 1.79                     | 0.37                   | 2.118(10)  | 0.411        |             |
|         | O(11)     | 1.79                     | 0.37                   | 2.128(10)  | 0.331        |             |
|         | O((11)#13 | 1.79                     | 0.37                   | 2.128(10)  | 0.402        |             |
|         | O(17)     | 1.79                     | 0.37                   | 2.203(14)  | 0.402        |             |
|         | O(18)     | 1.79                     | 0.37                   | 2.199(16)  | 0.328        |             |
| Mo1     | O(1)      | 1.907                    | 0.37                   | 2.305(12)  | 0.341        | 6.189       |
|         | O(2)      | 1.907                    | 0.37                   | 2.314(12)  | 0.333        |             |
|         | O(4)      | 1.907                    | 0.37                   | 1.858(9)   | 1.142        |             |
|         | O(4)#1    | 1.907                    | 0.37                   | 1.858(9)   | 1.142        |             |
|         | O(6)      | 1.907                    | 0.37                   | 1.734(13)  | 1.596        |             |
|         | O(8)      | 1.907                    | 0.37                   | 1.725(13)  | 1.644        |             |
| Mo2     | O(1)      | 1.907                    | 0.37                   | 2.170(3)   | 0.49         | 6.077       |
|         | O(3)      | 1.907                    | 0.37                   | 1.943(9)   | 0.912        |             |
|         | O(4)#1    | 1.907                    | 0.37                   | 2.281(8)   | 0.364        |             |
|         | O(5)      | 1.907                    | 0.37                   | 1.909(9)   | 0.997        |             |
|         | O(9)      | 1.907                    | 0.37                   | 1.760(10)  | 1.488        |             |
|         | O(10)     | 1.907                    | 0.37                   | 1.683(9)   | 1.827        |             |
| Mo3     | O(2)      | 1.907                    | 0.37                   | 2.189(3)   | 0.467        | 6.139       |
|         | O(4)#1    | 1.907                    | 0.37                   | 2.260(9)   | 0.385        |             |
|         | O(5)      | 1.907                    | 0.37                   | 1.964(9)   | 0.855        |             |
|         | O(7)      | 1.907                    | 0.37                   | 1.882(10)  | 1.073        |             |
|         | O(11)     | 1.907                    | 0.37                   | 1.742(10)  | 1.562        |             |
|         | O(14)     | 1.907                    | 0.37                   | 1.690(10)  | 1.793        |             |
| Mo4     | O(1)      | 1.907                    | 0.37                   | 2.050(12)  | 0.681        | 6.142       |
|         | O(3)      | 1.907                    | 0.37                   | 1.988(10)  | 0.801        |             |
|         | O(3)#1    | 1.907                    | 0.37                   | 1.988(10)  | 0.801        |             |
|         | O(8)      | 1.907                    | 0.37                   | 2.411(12)  | 0.257        |             |
|         | O(12)     | 1.907                    | 0.37                   | 1.676(14)  | 1.867        |             |
|         | O(13)     | 1.907                    | 0.37                   | 1.960(11)  | 0.874        |             |
| Mo5     | O(13)#1   | 1.907                    | 0.37                   | 1.960(11)  | 0.874        | 6.331       |
|         | O(2)      | 1.907                    | 0.37                   | 2.060(12)  | 0.66         |             |
|         | O(6)      | 1.907                    | 0.37                   | 2.434(13)  | 0.241        |             |
|         | O(7)      | 1.907                    | 0.37                   | 1.969(9)   | 0.848        |             |
|         | O(7)#1    | 1.907                    | 0.37                   | 1.969(9)   | 0.846        |             |
|         | O(15)     | 1.907                    | 0.37                   | 1.685(14)  | 1.827        |             |
|         | O(16)     | 1.907                    | 0.37                   | 1.923(11)  | 0.958        |             |
| O(16)#1 | 1.907     | 0.37                     | 1.923(11)              | 0.958      |              |             |

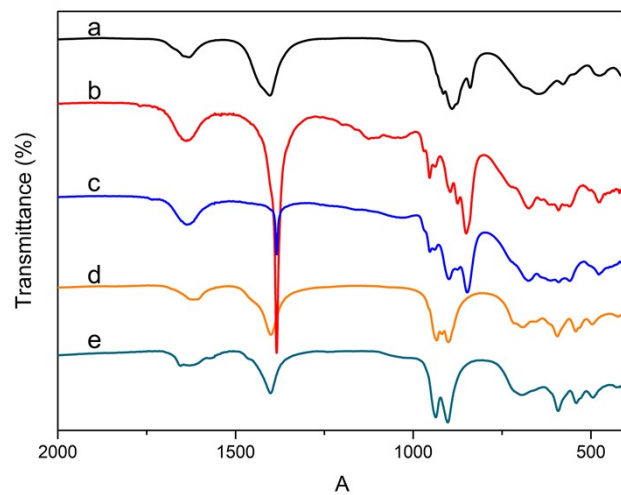

**Figure S1.** IR spectra of  $(\text{NH}_4)_6\text{Mo}_7\text{O}_{24}\cdot 4\text{H}_2\text{O}$  (a), **Cs-1** (b), **Cs-1** converted from  $[\text{MnMo}_9\text{O}_{32}]^{6-}$  (c)  $(\text{NH}_4)_6\text{MnMo}_9\text{O}_{32}\cdot 8\text{H}_2\text{O}$  (d) and the solid sample isolated from the solution of **Cs-1** (e).

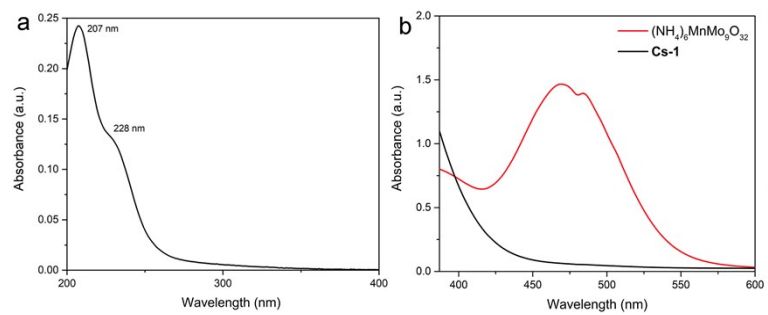

**Figure S2.** UV-Vis spectra of (a) Cs-1 (b) Cs-1 and (NH<sub>4</sub>)<sub>6</sub>MnMo<sub>9</sub>O<sub>32</sub>.

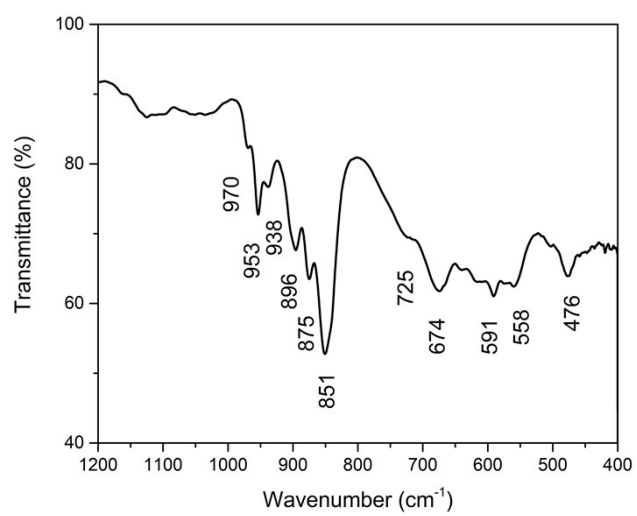

**Figure S3.** IR spectrum of Cs-1.

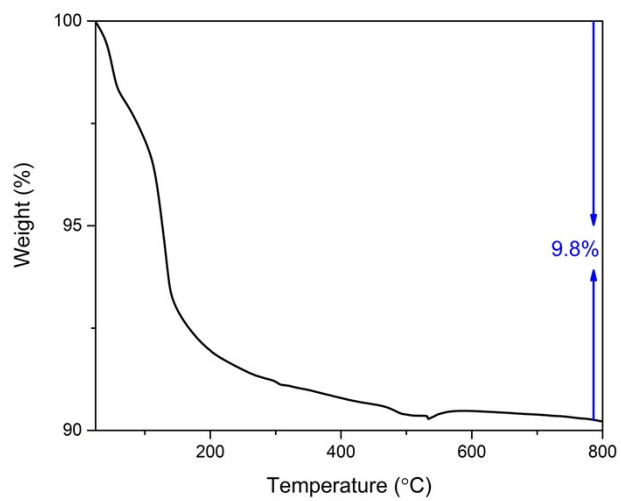

**Figure S4.** The thermogravimetric curve of Cs-1.



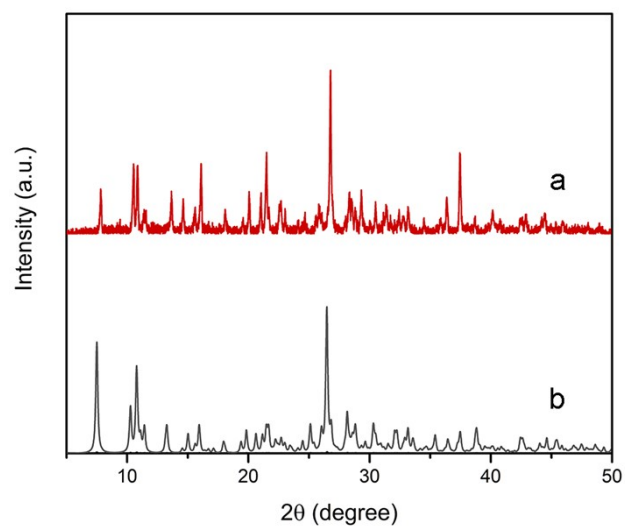

**Figure S5.** (a) Experimental and (b) simulated PXRD patterns of Cs-1.

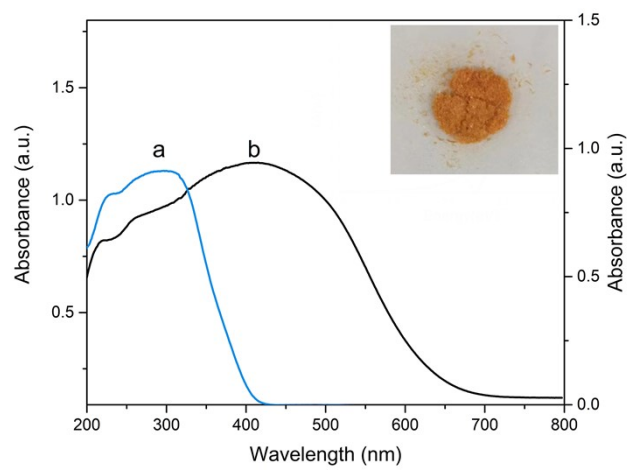

**Figure S6.** UV-Vis DRS of (NH<sub>4</sub>)<sub>4</sub>Mo<sub>7</sub>O<sub>24</sub> (a), Cs-1 (b). Insert photograph: the crystal of Cs-1.

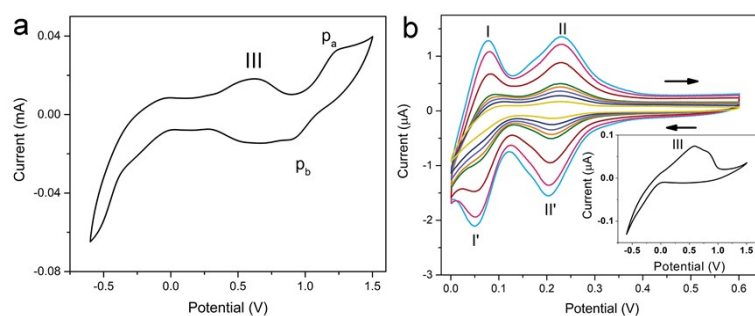

**Figure S7.** CV of **Cs-1** and  $(\text{NH}_4)_4[\text{Mo}_7\text{O}_{24}]\cdot 4\text{H}_2\text{O}$  in aqueous solution. (a) **Cs-1**. III: 0.603 V, the scan rate  $100 \text{ mV}\cdot\text{s}^{-1}$ , in the potential range from +1.5 to  $-0.6 \text{ V}$ . (b)  $(\text{NH}_4)_4[\text{Mo}_7\text{O}_{24}]\cdot 4\text{H}_2\text{O}$ . at various scan rates (from inner to outer: 20, 40, 60, 80, 100, 200, 300 and  $400 \text{ mV}\cdot\text{s}^{-1}$ , (I, I': 0.078, 0.052 V; II, II': 0.227, 0.208 V), in the potential range from +0.6 to  $-0.0 \text{ V}$ . (Insert: III: 0.601 V, the scan rate  $100 \text{ mV}\cdot\text{s}^{-1}$ , in the potential range from +1.5 to  $-0.6 \text{ V}$ )

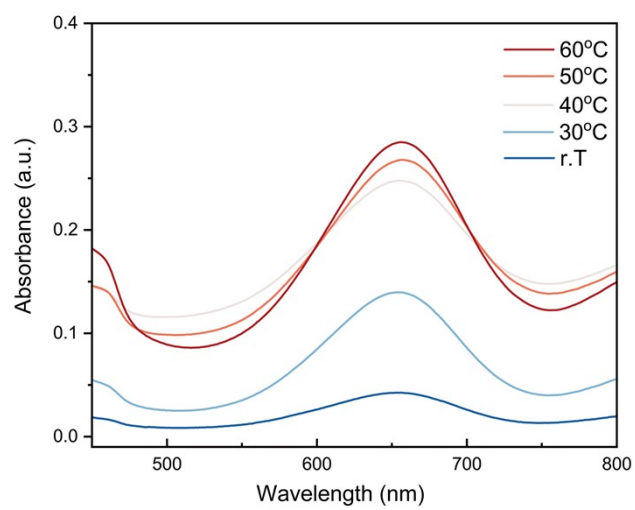

**Figure S8.** UV-Vis spectra of TMB<sup>+</sup> measured at different temperatures.

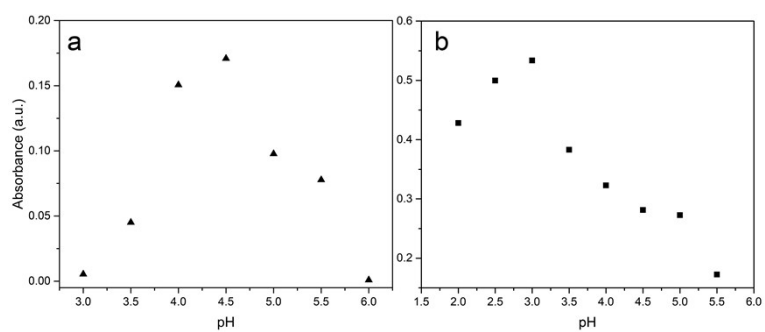

**Figure S9.** The absorbance of TMB<sup>+</sup> and OPD in their UV-Vis spectra at different pH. (a) 30 mM of TMB, 0.303 mM of Cs-1, 300 mM of H<sub>2</sub>O<sub>2</sub>, (b) 30 mM OPD, 60.6 μM Cs-1, 300 mM of H<sub>2</sub>O<sub>2</sub>, reaction time 20 min.

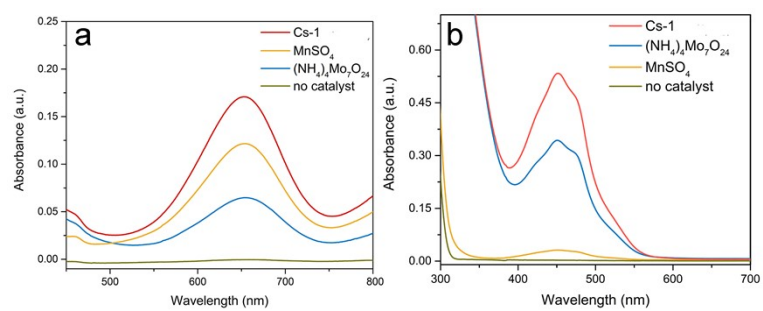

**Figure S10.** UV-Visible spectra of (a) TMB and (b) OPD systems using Cs-1, MnSO<sub>4</sub>, (NH<sub>4</sub>)<sub>4</sub>Mo<sub>7</sub>O<sub>24</sub> as catalysts and blank experiments at optimal pH, respectively.

## SI-8 References

1. John L. T. Waugh, David P. Shoemaker and L. Pauling, *Acta. Cryst.*, 1954, **7**, 438-441.
2. Y. H. Ren, Y. C. Hu, Z. P. Kong, M. Gu, B. Yue and H. Y. He, *Eur. J. Inorg. Chem.*, 2013, DOI: 10.1002/ejic.201201374, 1821-1826.
3. G. M. Sheldrick, *Acta Crystallogr C Struct Chem*, 2015, **71**, 3-8.
4. K. Momma and F. Izumi, *J. Appl. Crystallogr.*, 2011, **44**, 1272-1276.
5. W.-T. Liu and H. H. Thorp, *Inorg. Chem.*, 1993, **32**, 4102-4105.
